# Supplementary material for: Delineation of crustal structure in the part of Sonakhan Greenstone Belt in Bastar Craton, Mahasamund district, Chhattisgarh, India using integrated of geophysical methods for mineral investigation
Source: Research Square preprint supplement (doi:10.21203/rs.3.rs-4493598/v1), 2024-06-13
Supplement: Supplementary file 1 [file f1daac5e52ab6bcf0d715fd7.docx]

**Delineation of crustal structure in the part of Sonakhan Greenstone Belt in Bastar Craton, Mahasamund district, Chhattisgarh, India using integrated of**

**geophysical methods for mineral investigation**

The data of this article can not be share.
